# Supplementary material
Source: Research Square preprint supplement (doi:10.21203/rs.3.rs-9576813/v1)
Supplement: Supplementary file 1 [file b6d0fc819cb2736de056419d.docx]

**Supplementary Information (SI)**

**Manuscript title**: Enhancing electrical and thermoelectrical performance of Graphene nanosheets through geometrical defect engineering

**Omar Hatem Nower, Alaa A. Al-jobory**

*Department of Physics, College of Science, University of Anbar, Anbar, Iraq*

*e-mail:*[**oma24s2007@uoanbar.edu.iq**](mailto:oma24s2007@uoanbar.edu.iq)

*e-mail:*[**a.al-jobory@uoanbar.edu.iq**](mailto:a.al-jobory@uoanbar.edu.iq)

**Table 1: Summary of studied graphene nanosheet systems.**

| Models | Description of the strategy | The sub-system available in the appendix |
| --- | --- | --- |
| Model1 | The reference (Bare-GNR) | Bare-GNR (Fig: S1(a)) |
| Model2 | edge-to-center etching defects | GNR-ETC2, GNR-ETC3, GNR/GNR-ETC3 (Fig: S2(a,b,c)) |
| Model3 | center-to-edge etching | GNR-CTE2 (Fig: S1(b)) |
| Model4 | bidirectional etching | GNR-BE2 (Fig: S1(c)) |

(a)


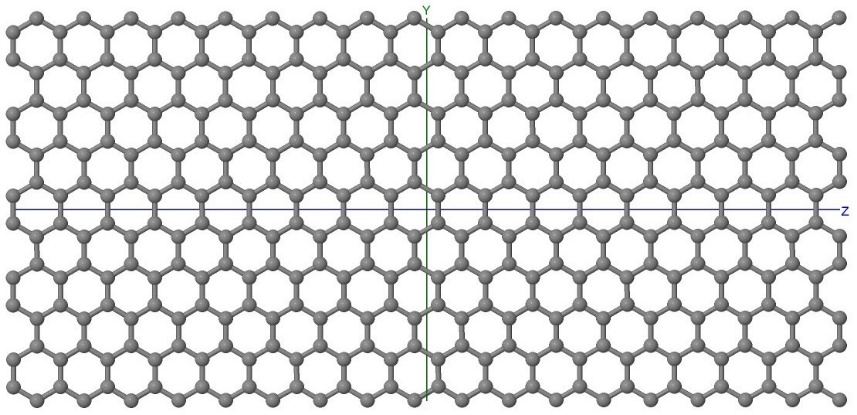

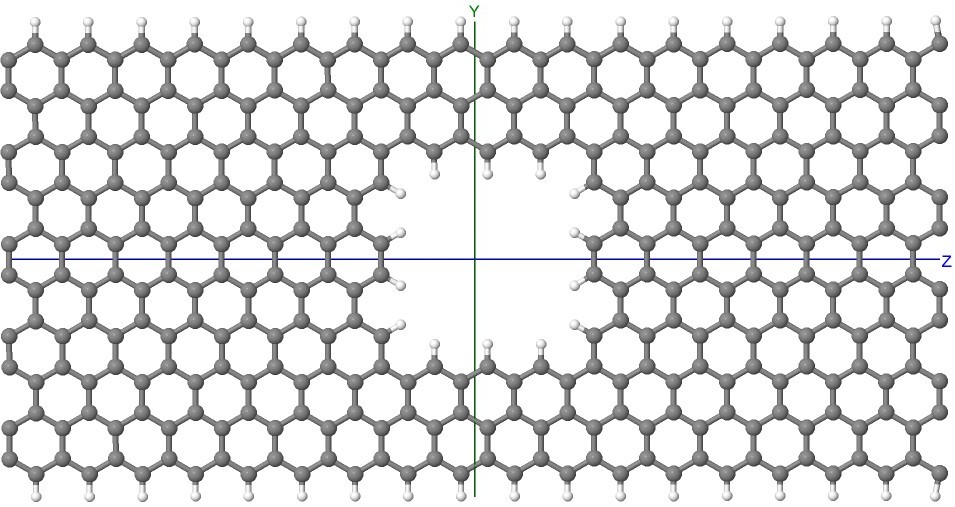


(b)


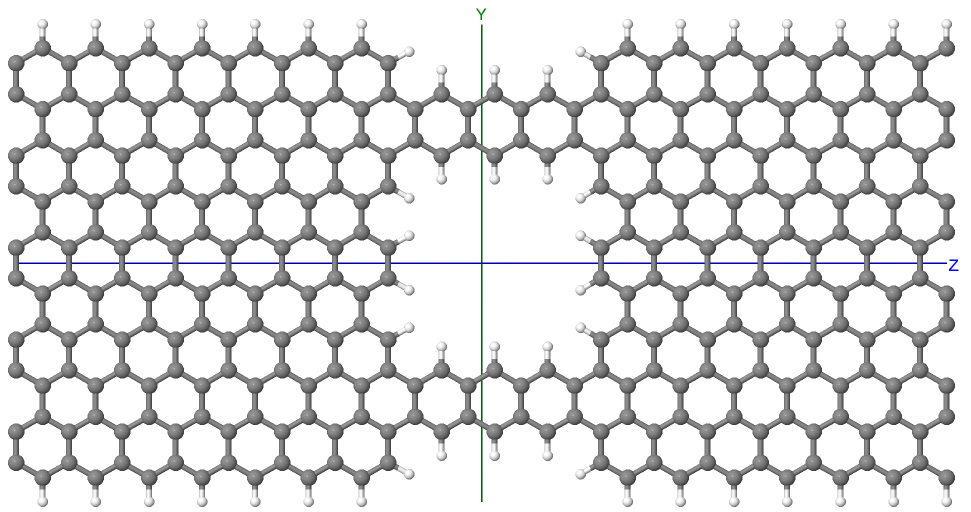


(c)

Figure S1: Geometric systems of graphene nanosheets under study, (a) Bare-GNR, (b) GNR-CTE2, (c) GNR-BE2

(a)


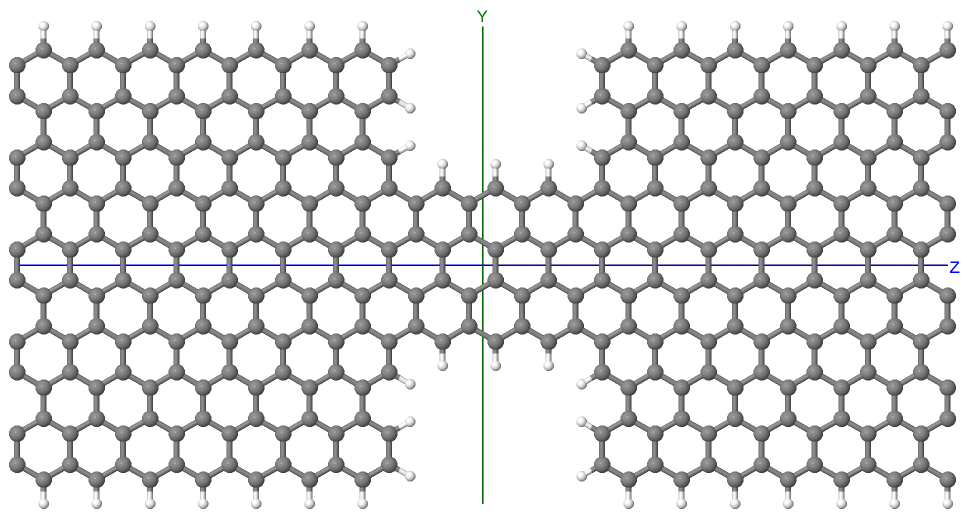

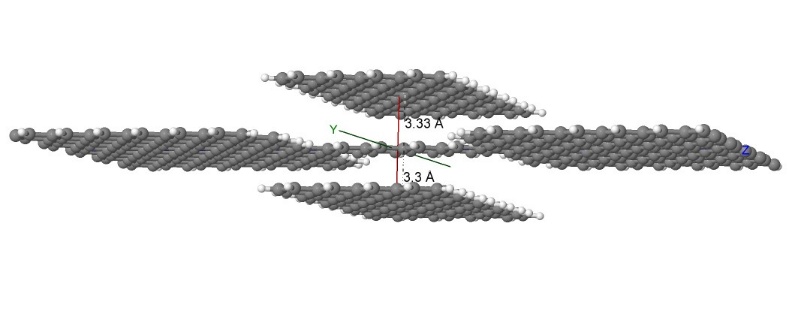


Side View


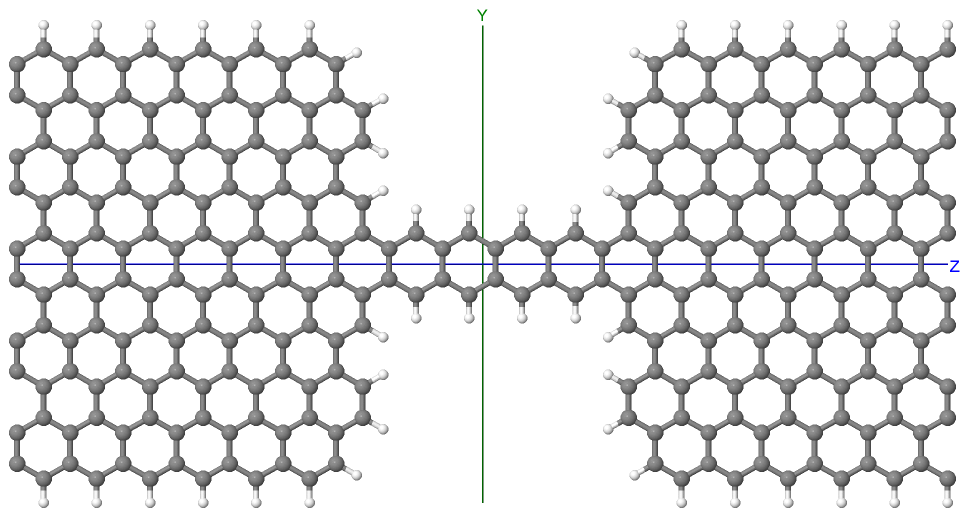


(b)


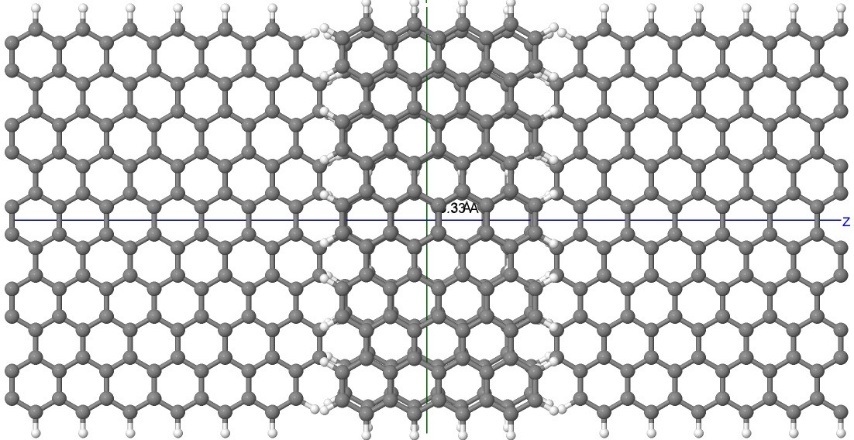


Top View

(c)

Figure S2: Geometric systems of graphene nanosheets under study, (a) GNR-ETC2, (b) GNR-ETC3,

(c) Top and side view of GNR/GNR-ETC3
